# Supplementary material
Source: MDPI journal article supplement (https://www.mdpi.com/2072-4292/16/2/336)
Supplement: s1 [file s1]

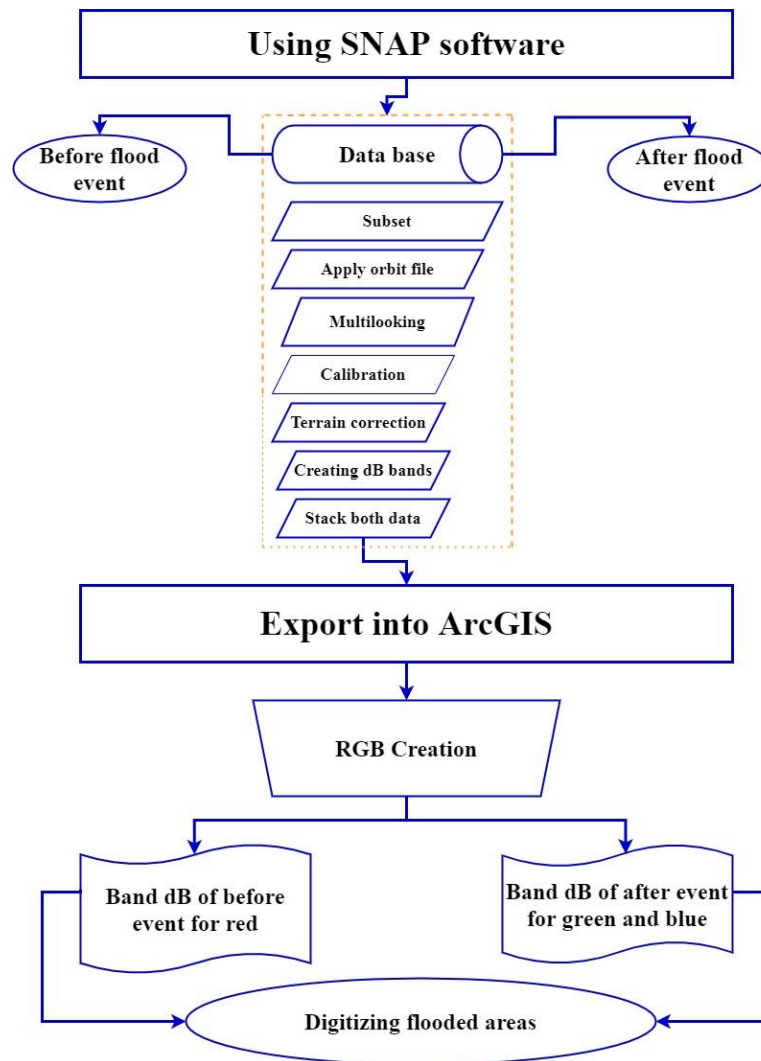

**Figure S1.** Flow chart for detecting flood areas in study areas using Sentinel-1 data.

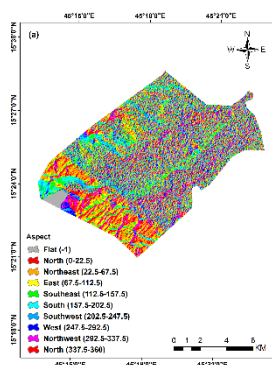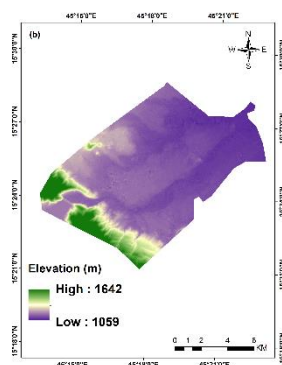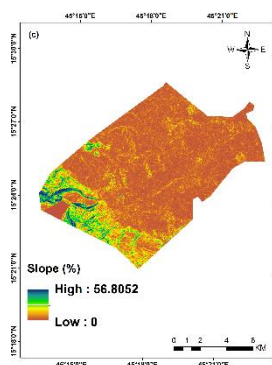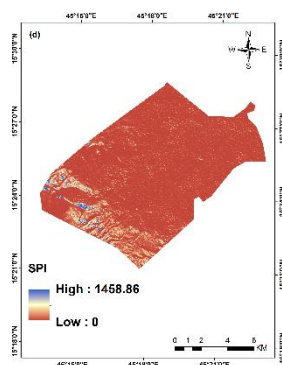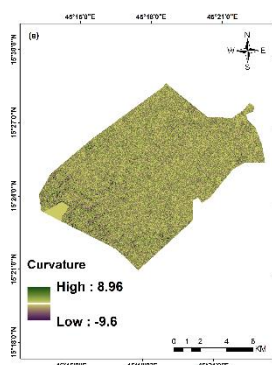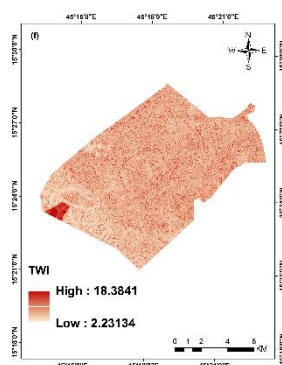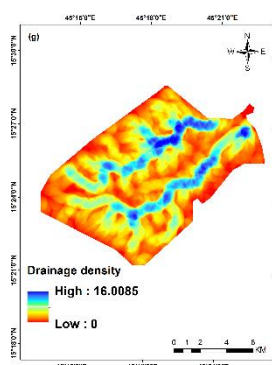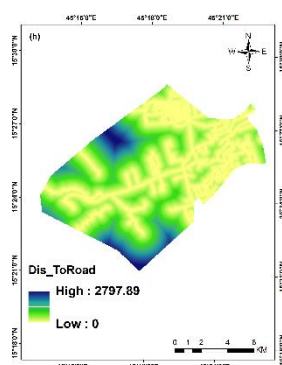

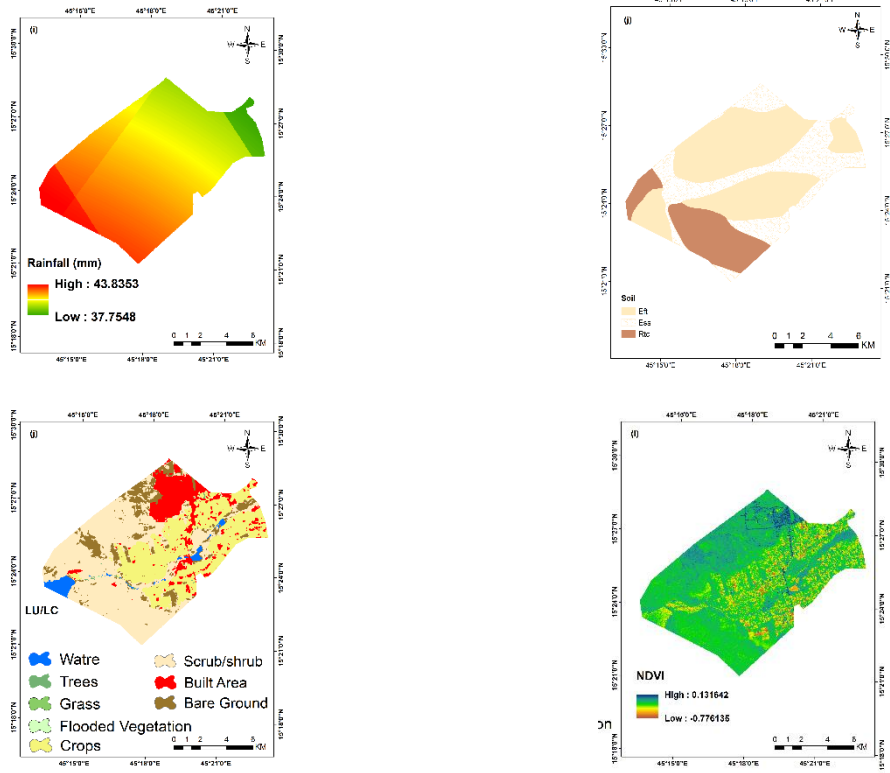

**Figure S2.** Flood conditioning factors (For Marib city case study). (a) Aspect, (b) elevation, (c) slope, (d) stream power index (SPI), (e) curvature, (f) topographic wetness index (TWI), (g) drainage density (Dd), (h) distance to road, (i) rainfall, (j) soil, (k) land use, and (l) NDVI.

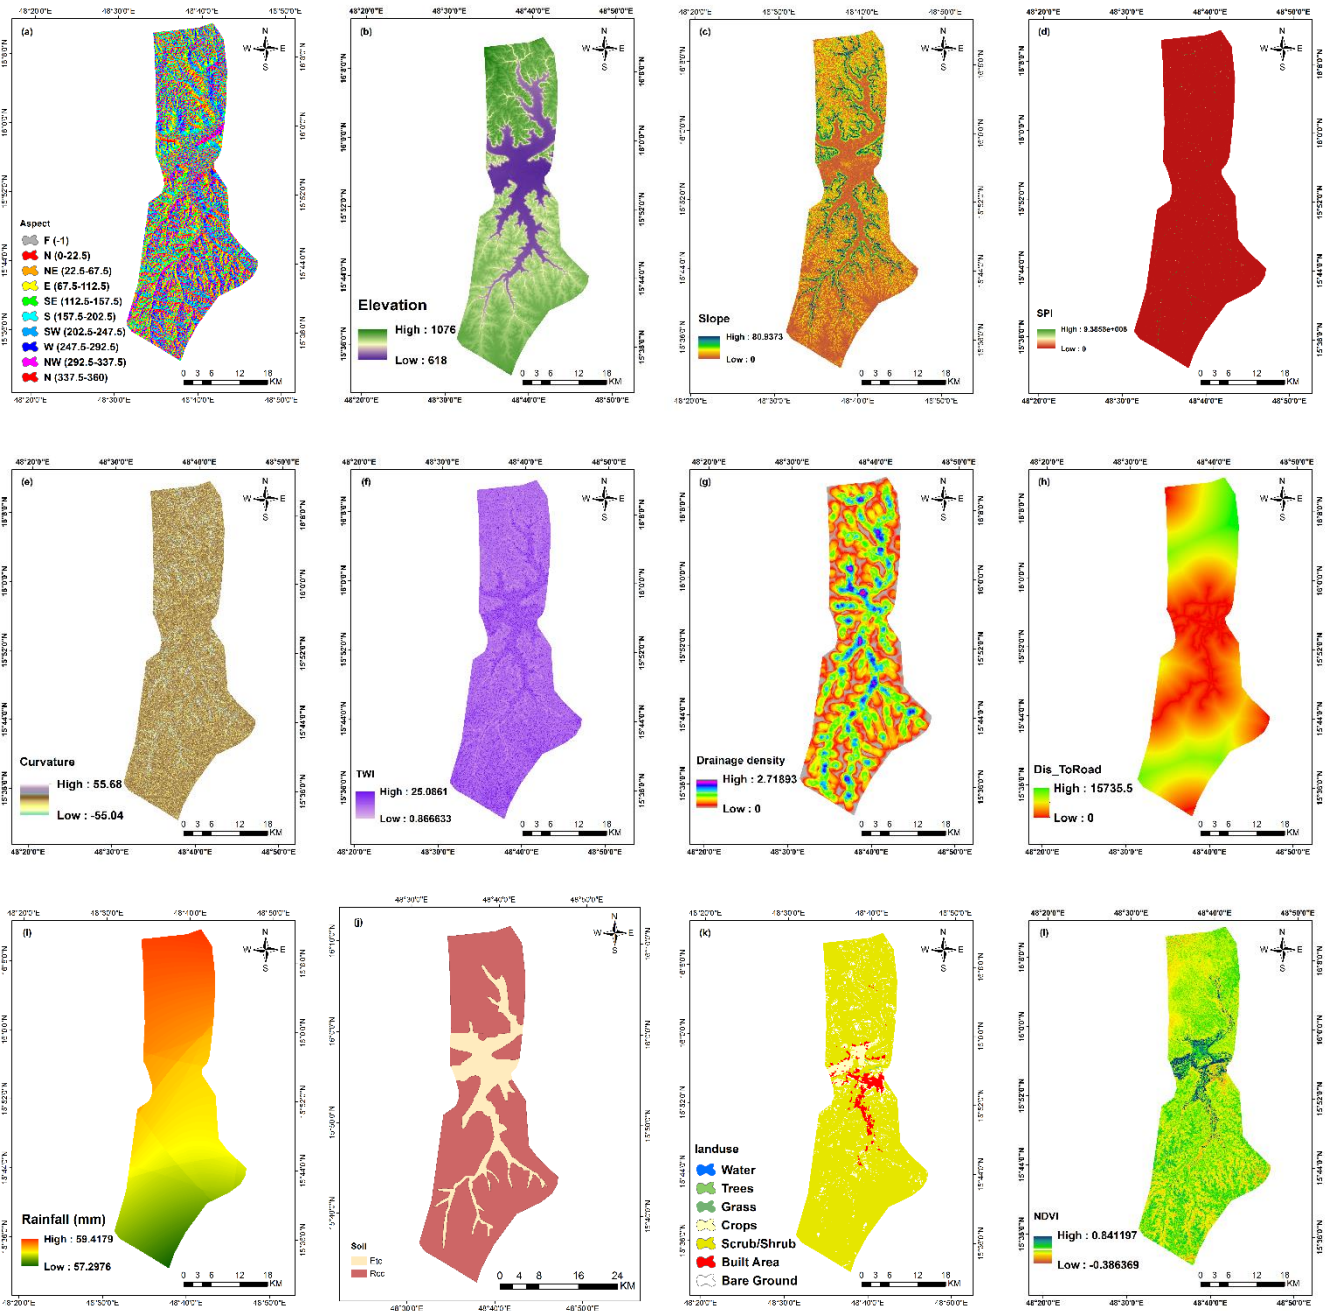

**Figure S3.** Flood conditioning factors (For Shibam city case study). (a) Aspect, (b) elevation, (c) slope, (d) stream power index (SPI), (e) curvature, (f) topographic wetness index (TWI), (g) drainage density (Dd), (h) distance to road, (i) rainfall, (j) soil, (k) land use, and (l) NDVI.

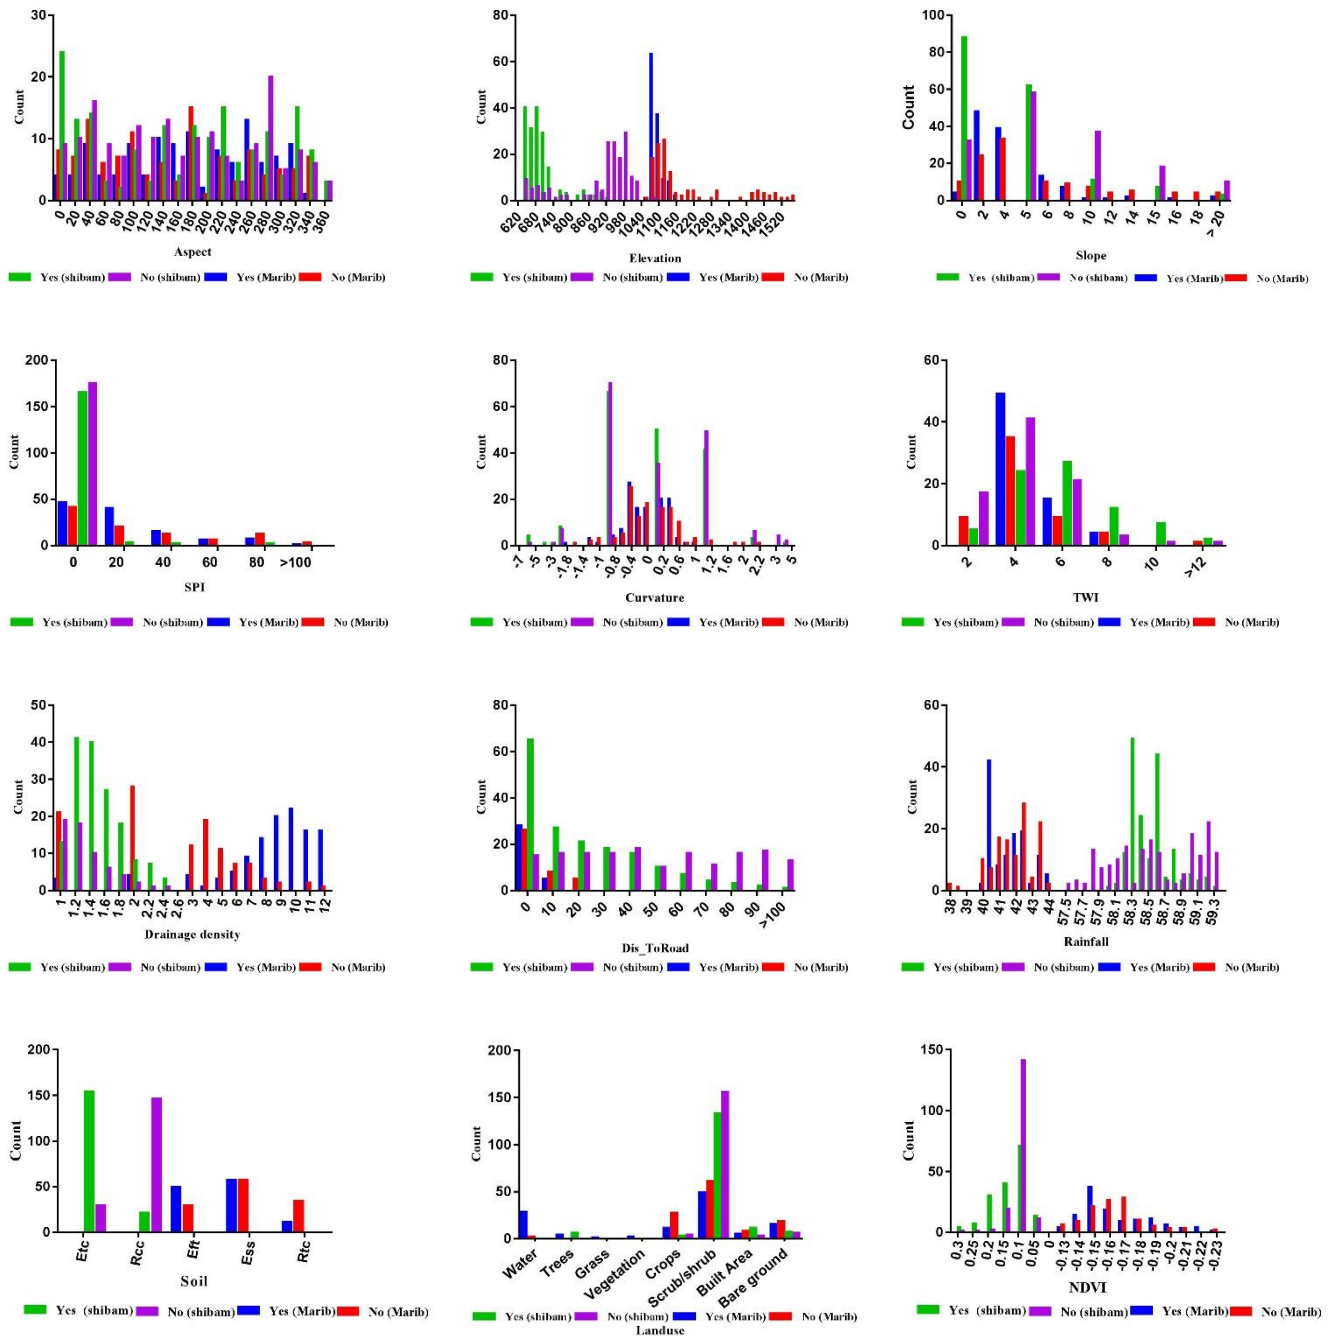

**Figure S4.** Factors distribution by Floods occurrences



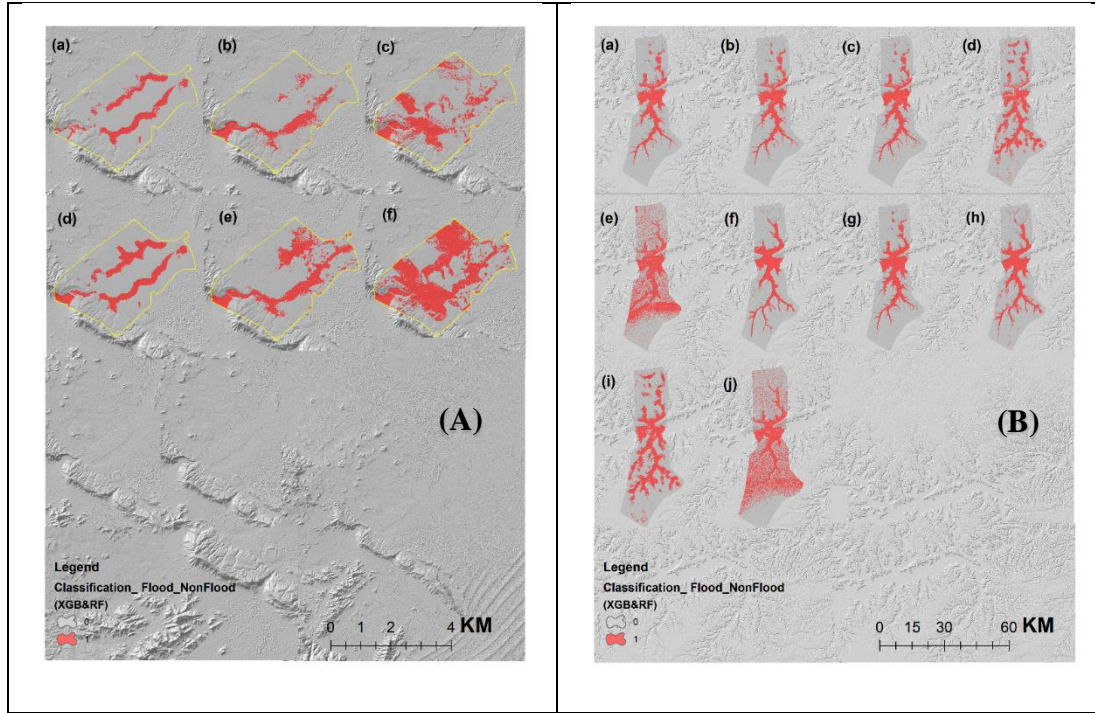

**Figure S5.** (A) Flood classification maps. For the XGB algorithm: (a) 12 factors, (b) 11 factors, and (c) 10 factors and For the RF algorithm: (d) 12 factors, (e) 11 factors, and (f) 10 factors, for Marib city case study. (B) Flood classification maps. For the XGB algorithm: (a) 12 factors, (b) 11 factors, (c) 10 factors, (d) 9 factors, and (e) 8 factors and For the RF algorithm: (f) 12 factors, (g) 11 factors, (h) 12 factors, (i) 11 factors, and (j) 10 factors, for Shibam city case study.

**Table S1.** The statistical properties of used data indices for Marib city (mean, min, max and median)

| Factors   | Class     | pixels | min   | max    | mean    | median  |
|-----------|-----------|--------|-------|--------|---------|---------|
| Aspect    | Flat      | 75909  | 47056 | 106199 | 77909.4 | 76927.5 |
|           | North     | 93326  |       |        |         |         |
|           | Northeast | 106199 |       |        |         |         |
|           | East      | 84138  |       |        |         |         |
|           | Southeast | 77946  |       |        |         |         |
|           | South     | 94573  |       |        |         |         |
|           | Southwest | 68834  |       |        |         |         |
|           | West      | 72002  |       |        |         |         |
|           | Northwest | 59111  |       |        |         |         |
|           | North     | 47056  |       |        |         |         |
| Elevation |           | 280175 | 6032  | 301273 | 79544.2 | 25415.5 |
|           |           | 301273 |       |        |         |         |

|          |             |        |       |        |          |         |
|----------|-------------|--------|-------|--------|----------|---------|
|          |             | 84619  |       |        |          |         |
|          |             | 30103  |       |        |          |         |
|          |             | 28257  |       |        |          |         |
|          |             | 22574  |       |        |          |         |
|          |             | 20051  |       |        |          |         |
|          |             | 13038  |       |        |          |         |
|          |             | 9320   |       |        |          |         |
|          |             | 6032   |       |        |          |         |
| Rainfall |             | 13985  | 13985 | 122932 | 79528.7  | 89660.5 |
|          |             | 25720  |       |        |          |         |
|          |             | 72454  |       |        |          |         |
|          |             | 87131  |       |        |          |         |
|          |             | 92190  |       |        |          |         |
|          |             | 102298 |       |        |          |         |
|          |             | 109995 |       |        |          |         |
|          |             | 122932 |       |        |          |         |
|          |             | 112476 |       |        |          |         |
|          |             | 56106  |       |        |          |         |
| Landuse  | Water       | 18756  | 1004  | 355074 | 99407.13 | 45541   |
|          | Trees       | 1604   |       |        |          |         |
|          | Grass       | 1004   |       |        |          |         |
|          | Vegetation  | 1004   |       |        |          |         |
|          | Crops       | 234396 |       |        |          |         |
|          | Scrub/shrub | 355074 |       |        |          |         |
|          | Built area  | 111093 |       |        |          |         |
|          | Bare Ground | 72326  |       |        |          |         |
| Slope    |             | 321280 | 8056  | 321280 | 113634.4 | 49981   |
|          |             | 268816 |       |        |          |         |
|          |             | 96749  |       |        |          |         |
|          |             | 49981  |       |        |          |         |
|          |             | 32382  |       |        |          |         |
|          |             | 18177  |       |        |          |         |
|          |             | 8056   |       |        |          |         |
| NDVI     |             | 28829  | 28829 | 411107 | 159051   | 122960  |
|          |             | 74068  |       |        |          |         |
|          |             | 158291 |       |        |          |         |
|          |             | 411107 |       |        |          |         |
|          |             | 122960 |       |        |          |         |
| SPI      |             | 571308 | 5046  | 571308 | 159088.2 | 49810   |
|          |             | 152550 |       |        |          |         |
|          |             | 49810  |       |        |          |         |
|          |             | 16727  |       |        |          |         |
|          |             | 5046   |       |        |          |         |
| TWI      |             | 189251 | 23368 | 314189 | 158997.4 | 182302  |
|          |             | 314189 |       |        |          |         |
|          |             | 182302 |       |        |          |         |

|                  |                                  |        |        |        |          |        |
|------------------|----------------------------------|--------|--------|--------|----------|--------|
| Drainage density |                                  | 85877  | 61195  | 242694 | 158597.6 | 151999 |
|                  |                                  | 23368  |        |        |          |        |
|                  |                                  | 240575 |        |        |          |        |
|                  |                                  | 242694 |        |        |          |        |
|                  |                                  | 151999 |        |        |          |        |
| Distance to road |                                  | 96525  | 47011  | 360751 | 159233.6 | 120147 |
|                  |                                  | 61195  |        |        |          |        |
|                  |                                  | 360751 |        |        |          |        |
|                  |                                  | 192349 |        |        |          |        |
|                  |                                  | 120147 |        |        |          |        |
| Curvature        | Concave                          | 75910  | 1      | 473708 | 265147   | 321732 |
|                  |                                  | 47011  |        |        |          |        |
|                  |                                  | 321732 |        |        |          |        |
| SOIL             | Plat                             | 473708 | 145148 | 411558 | 265365.3 | 239390 |
|                  | Convex                           | 1      |        |        |          |        |
|                  | Eft (sedimentary soils, dry      | 239390 |        |        |          |        |
|                  | sedimentary soils, and dry       |        |        |        |          |        |
|                  | limestone soils)                 |        |        |        |          |        |
|                  | Ess (dry sandy soils)            | 411558 | 145148 |        |          |        |
|                  | Rtc (Dry soil, Sedimentary soil, | 145148 |        |        |          |        |
|                  | dry limestone soils, and shallow |        |        |        |          |        |
|                  | soils)                           |        |        |        |          |        |

**Table S2.**The statistical properties of used data indices for Shibam city (mean, min, max and median)

| Factors   | Class     | pixels | min   | max    | mean     | median   |
|-----------|-----------|--------|-------|--------|----------|----------|
| Aspect    |           | 159367 | 94712 | 159367 | 124033.1 | 123752.5 |
|           | North     | 144960 |       |        |          |          |
|           | Northeast | 124799 |       |        |          |          |
|           | East      | 138188 |       |        |          |          |
|           | Southeast | 127974 |       |        |          |          |
|           | South     | 94712  |       |        |          |          |
|           | Southwest | 108976 |       |        |          |          |
|           | West      | 112916 |       |        |          |          |
|           | Northwest | 122706 |       |        |          |          |
|           | North     | 105733 |       |        |          |          |
| Elevation |           | 148323 | 39619 | 274451 | 124033.1 | 89453.5  |
|           |           | 82046  |       |        |          |          |
|           |           | 56701  |       |        |          |          |
|           |           | 39619  |       |        |          |          |
|           |           | 40668  |       |        |          |          |
|           |           | 96861  |       |        |          |          |
|           |           | 274451 |       |        |          |          |
|           |           | 230894 |       |        |          |          |
|           |           | 210585 |       |        |          |          |
|           |           |        |       |        |          |          |



|                  |             |         |        |         |           |        |
|------------------|-------------|---------|--------|---------|-----------|--------|
| Rainfall         |             | 60183   |        |         |           |        |
|                  |             | 39426   | 39426  | 183508  | 124033    | 128212 |
|                  |             | 77765   |        |         |           |        |
|                  |             | 111474  |        |         |           |        |
|                  |             | 139077  |        |         |           |        |
|                  |             | 122753  |        |         |           |        |
|                  |             | 174868  |        |         |           |        |
|                  |             | 133671  |        |         |           |        |
|                  |             | 89963   |        |         |           |        |
|                  |             | 167825  |        |         |           |        |
| Landuse          |             | 183508  |        |         |           |        |
|                  | Water       | 1203    | 1203   | 1076528 | 177293.57 | 41307  |
|                  | Trees       | 41307   |        |         |           |        |
|                  | Grass       | 2459    |        |         |           |        |
|                  | Crops       | 1076528 |        |         |           |        |
|                  | Scrub/shrub | 11677   |        |         |           |        |
|                  | Built area  | 46219   |        |         |           |        |
| Slope            | Bare Ground | 61662   |        |         |           |        |
|                  |             | 571835  | 19064  | 571835  | 177190    | 100947 |
|                  |             | 259181  |        |         |           |        |
|                  |             | 192495  |        |         |           |        |
|                  |             | 100947  |        |         |           |        |
|                  |             | 61774   |        |         |           |        |
|                  |             | 35034   |        |         |           |        |
| NDVI             |             | 19064   |        |         |           |        |
|                  |             | 409233  | 6957   | 661873  | 248052.2  | 139616 |
|                  |             | 661873  |        |         |           |        |
|                  |             | 139616  |        |         |           |        |
| SPI              |             | 22582   |        |         |           |        |
|                  |             | 6957    |        |         |           |        |
|                  |             | 1238510 | 36     | 1238510 | 248066.2  | 436    |
|                  |             | 1209    |        |         |           |        |
|                  |             | 436     |        |         |           |        |
| TWI              |             | 140     |        |         |           |        |
|                  |             | 36      |        |         |           |        |
|                  |             | 389115  | 18846  | 520739  | 248065.8  | 226284 |
|                  |             | 520739  |        |         |           |        |
|                  |             | 226284  |        |         |           |        |
| Drainage density |             | 85345   |        |         |           |        |
|                  |             | 18846   |        |         |           |        |
|                  |             | 329908  | 100063 | 337699  | 247921.6  | 260519 |
|                  |             | 337699  |        |         |           |        |
| Distance to road |             | 260519  |        |         |           |        |
|                  |             | 211419  |        |         |           |        |
|                  |             | 100063  |        |         |           |        |
|                  |             | 386725  | 79162  | 386725  | 248066    | 252481 |

|           |                                                                          |        |        |        |           |          |
|-----------|--------------------------------------------------------------------------|--------|--------|--------|-----------|----------|
|           |                                                                          | 286248 |        |        |           |          |
|           |                                                                          | 252481 |        |        |           |          |
|           |                                                                          | 235714 |        |        |           |          |
|           |                                                                          | 79162  |        |        |           |          |
| Curvature | Concave                                                                  | 466526 | 10159  | 763645 | 413443.33 | 466526   |
|           | Plat                                                                     | 763645 |        |        |           |          |
|           | Convex                                                                   | 10159  |        |        |           |          |
| SOIL      | Etc (dry soil, dry sedimentary soil, soil dry, and limestone soil)       | 251801 | 251801 | 988530 | 620165.5  | 620165.5 |
|           | Rcc (dry limestone, soil dry, shallow calcareous soil, and shallow soil) | 988530 |        |        |           | 5        |

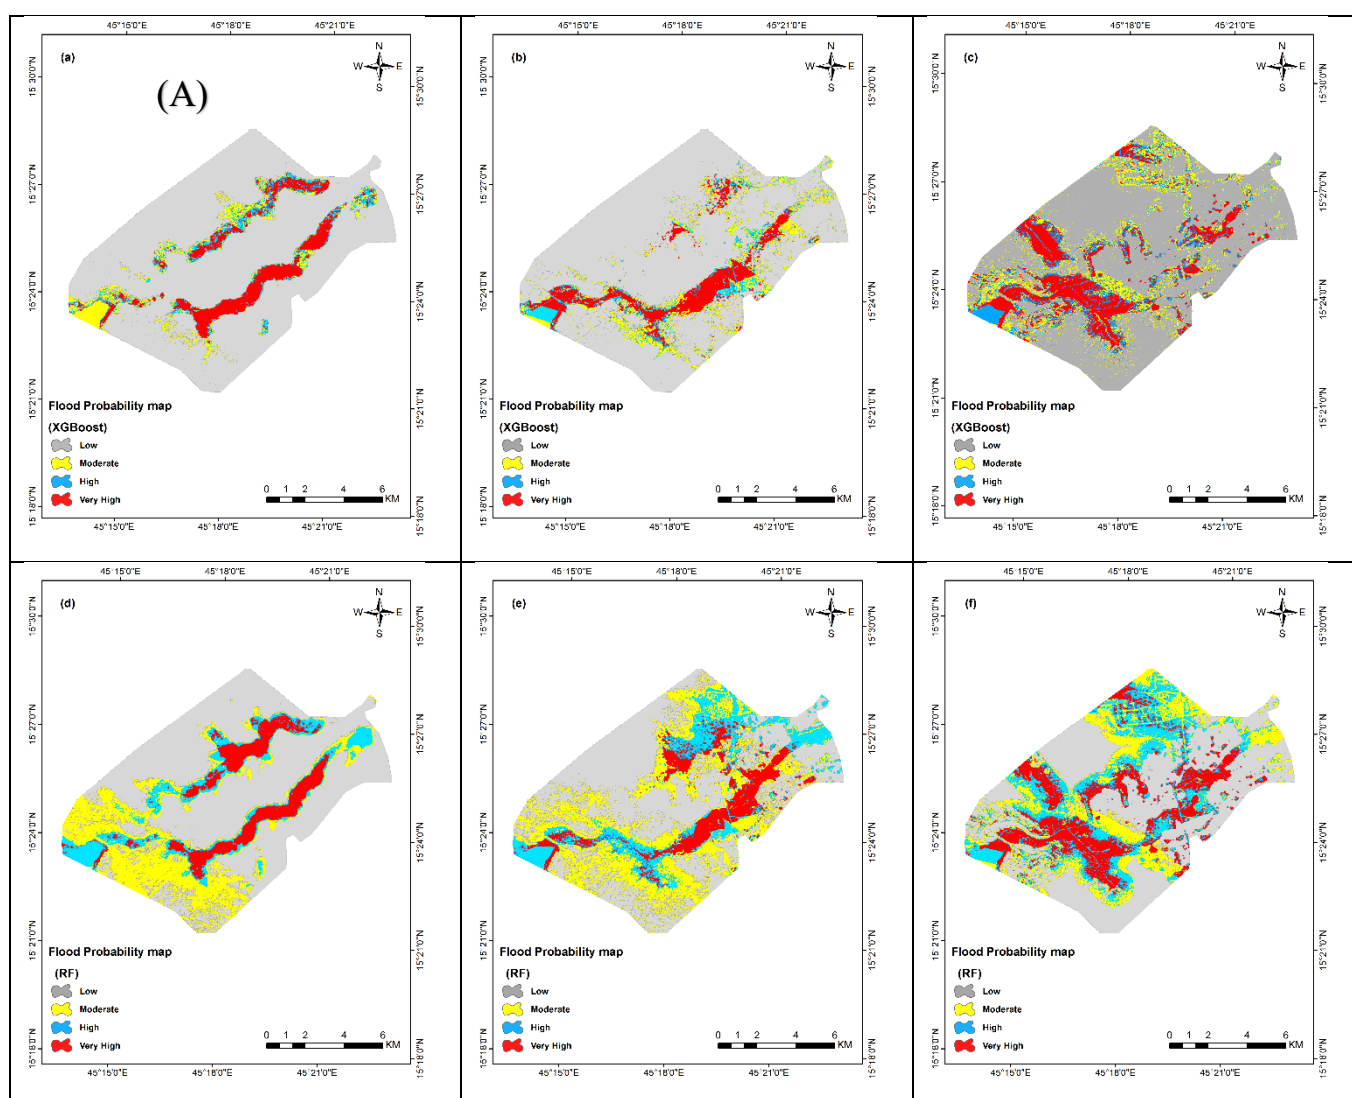

**Figure S6.** (A) Flood probability maps (For Marib City). For the XGB algorithm: (a) 12 factors, (b) 11 factors, and (c) 10 factors; For the RF algorithm: (d) 12 factors, (e) 11 factors, and (f) 10 factors. (B) Flood probability maps (For Shibam City). For the XGB algorithm: (a) 12 factors, (b) 11 factors, (c) 10 factors, (d) 9 factors, and (e) 8 factors; For the RF algorithm: (f) 12 factors, (g) 11 factors, (h) 10 factors, (i) 9 factors, and (j) 8 factors.
